# Supplementary material for: Domain-Specific Common Data Elements for Rare Disease Registration: Conceptual Approach of a European Joint Initiative Toward Semantic Interoperability in Rare Disease Research
Source: PubMed Central journal article supplement (PMC9166638; doi:10.2196/32158), 2022-05-20
Supplement: medinform_v10i5e32158_app1.pdf [file medinform_v10i5e32158_app1.pdf]

## List of the 24 initially funded ERNs

| Acronym of the ERN   | Name of the ERN                                                                               |
|----------------------|-----------------------------------------------------------------------------------------------|
| ERN BOND             | European Reference Network on bone disorders                                                  |
| ERN CRANIO           | European Reference Network on craniofacial anomalies and ear, nose and throat (ENT) disorders |
| Endo-ERN             | European Reference Network on endocrine conditions                                            |
| ERN EpiCARE          | European Reference Network on epilepsies                                                      |
| ERKNet               | European Reference Network on kidney diseases                                                 |
| ERN-RND              | European Reference Network on neurological diseases                                           |
| ERNICA               | European Reference Network on inherited and congenital anomalies                              |
| ERN LUNG             | European Reference Network on respiratory diseases                                            |
| ERN Skin             | European Reference Network on skin disorders                                                  |
| ERN EURACAN          | European Reference Network on adult cancers (solid tumours)                                   |
| ERN EuroBloodNet     | European Reference Network on haematological diseases                                         |
| ERN eUROGEN          | European Reference Network on urogenital diseases and conditions                              |
| ERN EURO-NMD         | European Reference Network on neuromuscular diseases                                          |
| ERN EYE              | European Reference Network on eye diseases                                                    |
| ERN GENTURIS         | European Reference Network on genetic tumour risk syndromes                                   |
| ERN GUARD-HEART      | European Reference Network on diseases of the heart                                           |
| ERN ITHACA           | European Reference Network on congenital malformations and rare intellectual disability       |
| MetabERN             | European Reference Network on hereditary metabolic disorders                                  |
| ERN PaedCan          | European Reference Network on paediatric cancer (haemato-oncology)                            |
| ERN RARE-LIVER       | European Reference Network on hepatological diseases                                          |
| ERN ReCONNET         | European Reference Network on connective tissue and musculoskeletal diseases                  |
| ERN RITA             | European Reference Network on immunodeficiency, autoinflammatory and autoimmune diseases      |
| ERN TRANSPLANT-CHILD | European Reference Network on Transplantation in Children                                     |
| VASCERN              | European Reference Network on Rare Multisystemic Vascular Diseases                            |
